# Supplementary material for: Visualizing sarcomere and cellular dynamics in skeletal muscle to improve cell therapies
Source: eLife. 2024 Dec 17;13:e95597. doi: 10.7554/eLife.95597 (PMC11651650; doi:10.7554/eLife.95597)
Supplement: Figure 1—figure supplement 1—source data 3. [file elife-95597-fig1-figsupp1-data3.xlsx]

## Sheet: Figure1S1bcd
	Figure 1S1b
		Signal intensity at Z-disc of EDL (a.u.)
		tg/tg	tg/wt	wt/wt
		843.341	617	222.994
		1375.91	825.949	225.768
		1395.83	1050.75	168.062
	Figure 1S1c
		Body weight (g)
		tg/tg	tg/wt	wt/wt
		24.3	24.3	24.7
		24	23.4	24.8
		26.1	23.8	25.2
		27.73	25	26
		29.64	28.07	26.7
	Figure 1S1(d)
		Heart weight (mg)
		tg/tg	tg/wt	wt/wt
		103.5	103.9	112.4
		91.3	103.2	125.1
		98.4	121.3	136.8
		162.9	116.3	144.5
		171.5	162.5	139.4
	Figure 1S1d
		HW/BW
		tg/tg	tg/wt	wt/wt
		4.25926	4.27572	4.55061
		3.80417	4.41026	5.04436
		3.77012	5.09664	5.42857
		5.8745	4.652	5.55769
		5.7861	5.7891	5.22097
