# Supplementary material for: Visualizing sarcomere and cellular dynamics in skeletal muscle to improve cell therapies
Source: eLife. 2024 Dec 17;13:e95597. doi: 10.7554/eLife.95597 (PMC11651650; doi:10.7554/eLife.95597)
Supplement: Figure 1—source data 1. [file elife-95597-fig1-data1.xlsx]

## Sheet: Figure1f
Figure 1f	time [h]	mCherry									DsRed
	0	2447.36	3972.55	2875.91	1261.93	1427.47	1147.12	1775.88	1754.7	1849.31	217.248	175.473	174.792	103.94	109.966	135.039	141.891	147.765	127.514
	1	2149.89	3283.61	2298.63	1500.3	1365.63	1107.98	1556.44	1661.69	1607.59	176.427	163.285	156.139	117.988	74.151	59.958	136.688	91.566	123.59
	2	2236.12	3322.84	2631.95	1602.14	1597.34	1480.03	1538.65	1894.17	1437.4	197.097	194.241	196.413	114.592	86.178	118.031	115.538	111.645	104.491
	3	2391.92	3284.38	2564.23	1601.08	1532.54	1549.38	1576.08	1801.56	1597.87	191.184	181.444	177.176	131.711	131.007	111.009	126.473	82.621	110.382
	4	2386.04	3141.46	2441.51	1462.63	1487.97	1639.37	1533.97	1734.83	1928.26	198.105	210.746	158.456	127.239	116.336	121.158	135.245	111.07	100.194
	5	2283.51	2866.05	2299.52	1269.23	1464.11	1763.27	1701.06	1878.92	1963.25	190.008	204.749	170.786	122.926	118.361	90.776	105.432	95.92	78.205
	6	2588.16	2625.51	1901.84	1526.94	1629.91	1784.52	1800.53	1931.37	1641.48	200.713	203.425	158.315	118.657	120.115	73.113	99.849	112.647	99.689
	7	2421.73	2644.38	2071.76	1595.14	1630.26	1780.92	1701.64	1924.88	1385.42	188.615	171.988	161.48	126.591	113.393	158.002	124.771	133.689	121.217
	8	2123.63	2666.27	2029.45	1575.11	1535.52	1714.88	1589.4	1858.16	1531.63	195.143	216.405	130.983	135.362	93.285	151.551	141.84	122.255	104.775
	9	2275.45	2710.52	2269.96	1658.14	1419.44	1583.92	1636.68	2052.16	1219.15	168.705	253.126	146.369	145.416	126.602	108.806	148.85	155.043	95.282
	10	2441.95	2528.91	2325.37	1740.4	1323.05	1444.58	1696.38	1839.08	1252.61	184.94	136.831	179.669	144.361	107.594	131.927	166.908	136.868	128.148
	11	2434.9	2483.03	2308.51	1535.61	1548.34	1531.5	1749.58	2096.49	1032.13	171.454	157.29	184.409	99.899	122.309	134.521	136.235	129.252	140.864
	12	2188.64	2110.23	1666.9	1197.39	1571.47	1853.31	1723.41	1830.34	1118.9	164.342	228.611	187.777	94.939	129.147	113.033	164.015	129.247	128.573
	13	2507.58	2370.69	2172.94	1214.78	1811.98	1229.67	1574.1	1854.03	1237.02	264.234	267.449	163.554	125.539	143.153	110.133	156.434	129.06	142.177
	14	2335.89	2234.65	2397.55	1224.98	1458.67	958.751	1599.67	1595.91	1192.79	240.776	260.666	190.375	95.325	147.989	154.993	158.541	134.468	129.051
	Mean	2347.52	2816.34	2283.74	1464.39	1520.25	1504.61	1650.23	1847.22	1466.32	196.599	201.715	169.113	120.299	115.972	118.137	137.247	121.541	115.61
