# Supplementary material for: Visualizing sarcomere and cellular dynamics in skeletal muscle to improve cell therapies
Source: eLife. 2024 Dec 17;13:e95597. doi: 10.7554/eLife.95597 (PMC11651650; doi:10.7554/eLife.95597)
Supplement: Figure 2—figure supplement 1—source data 1. [file elife-95597-fig2-figsupp1-data1.xlsx]

## Sheet: Figure2S1bcdefgh
	Figure 2S1b	fixed cells									Figure 2S1d	GFP M-band live vs. Fixed									Figure 2S1c	mCherry Z-disc live vs. Fixed
	time (min)	GFP-M				mCherry-Z					time (min)	GFP-M live				GFP-M fixed					time (min)	mCherry-Z fixed				mCherry-Z live
	0	0.103442	0.134284	0.128632	0.112773	0.135872	0.177043	0.147046	0.098366		0	0.142631	0.111013	0.145663		0.103442	0.134284	0.128632	0.112773		0	0.135872	0.177043	0.147046	0.098366	0.208947	0.154298	0.188035
	5	0.170533	0.194188	0.181158	0.163012	0.169111	0.224456	0.184627	0.137115		5	0.212992	0.162725	0.243713		0.170533	0.194188	0.181158	0.163012		5	0.169111	0.224456	0.184627	0.137115	0.393434	0.395079	0.407618
	10	0.182831	0.206127	0.190627	0.170631	0.18447	0.233055	0.183542	0.153517		10	0.221239	0.171042	0.250379		0.182831	0.206127	0.190627	0.170631		10	0.18447	0.233055	0.183542	0.153517	0.417555	0.420023	0.433535
	15	0.177743	0.213408	0.196494	0.1652	0.181828	0.239785	0.193324	0.155593		15	0.228829	0.176233	0.255694		0.177743	0.213408	0.196494	0.1652		15	0.181828	0.239785	0.193324	0.155593	0.44094	0.435381	0.450629
	20	0.183268	0.217948	0.200835	0.166605	0.182124	0.249818	0.194743	0.164176		20	0.229154	0.183237	0.257508		0.183268	0.217948	0.200835	0.166605		20	0.182124	0.249818	0.194743	0.164176	0.452247	0.450377	0.461764
	25	0.187644	0.228252	0.19487	0.174638	0.189987	0.250236	0.194619	0.163271		25	0.239899	0.184969	0.265498		0.187644	0.228252	0.19487	0.174638		25	0.189987	0.250236	0.194619	0.163271	0.461355	0.472256	0.47517
	60	0.209311	0.250928	0.207651	0.184817	0.214844	0.269211	0.200434	0.192104		60	0.261009	0.201028	0.297693		0.209311	0.250928	0.207651	0.184817		60	0.214844	0.269211	0.200434	0.192104	0.515298	0.525395	0.522525
	90	0.228811	0.270178	0.219842	0.198311	0.225301	0.269221	0.21848	0.219013		90	0.28244	0.217985	0.346783		0.228811	0.270178	0.219842	0.198311		90	0.225301	0.269221	0.21848	0.219013	0.566784	0.559162	0.564247
	120	0.241556	0.277012	0.227319	0.208351	0.235928	0.289628	0.21466	0.232975		120	0.309772	0.227519	0.39193		0.241556	0.277012	0.227319	0.208351		120	0.235928	0.289628	0.21466	0.232975	0.584016	0.599971	0.594482
	180	0.262882	0.30744	0.224084	0.216419	0.262501	0.310496	0.220878	0.243663		180	0.348991	0.256244	0.436503		0.262882	0.30744	0.224084	0.216419		180	0.262501	0.310496	0.220878	0.243663	0.634984	0.623311	0.656251
	240	0.269941	0.322897	0.224223	0.232925	0.277945	0.315003	0.225774	0.256091		240	0.375566	0.282014	0.470452		0.269941	0.322897	0.224223	0.232925		240	0.277945	0.315003	0.225774	0.256091	0.683389	0.670145	0.687631
	300	0.284838	0.327853	0.234576	0.238229	0.294307	0.319953	0.226524	0.260801		300	0.393487	0.313457	0.485929		0.284838	0.327853	0.234576	0.238229		300	0.294307	0.319953	0.226524	0.260801	0.674941	0.683942	0.714954
	360	0.295088	0.342808	0.246151	0.246756	0.304802	0.332007	0.236473	0.267714		360	0.408186	0.335022	0.485736		0.295088	0.342808	0.246151	0.246756		360	0.304802	0.332007	0.236473	0.267714	0.73282	0.731533	0.692305
	420	0.311383	0.343342	0.238002	0.259864	0.321075	0.337787	0.238435	0.277609		420	0.429608	0.362494	0.502413		0.311383	0.343342	0.238002	0.259864		420	0.321075	0.337787	0.238435	0.277609	0.739444	0.736245	0.710692
	480	0.307578	0.344564	0.241842	0.260537	0.317412	0.346185	0.235024	0.283072		480	0.445075	0.373842	0.506092		0.307578	0.344564	0.241842	0.260537		480	0.317412	0.346185	0.235024	0.283072	0.753921	0.738406	0.692017
	540	0.317597	0.345699	0.245677	0.263225	0.333236	0.339973	0.24118	0.29343		540	0.460438	0.3896	0.49683		0.317597	0.345699	0.245677	0.263225		540	0.333236	0.339973	0.24118	0.29343	0.794029	0.784464	0.668038
	600	0.312563	0.348203	0.25146	0.277471	0.334998	0.343314	0.244984	0.294007		600	0.496331	0.403137	0.509621		0.312563	0.348203	0.25146	0.277471		600	0.334998	0.343314	0.244984	0.294007	0.789877	0.772549	0.66496
	660	0.315828	0.348731	0.253186	0.281395	0.340084	0.359864	0.249722	0.301198		660	0.53885	0.411767	0.533148		0.315828	0.348731	0.253186	0.281395		660	0.340084	0.359864	0.249722	0.301198	0.799137	0.778679	0.684753
	720	0.327053	0.351634	0.262936	0.288976	0.351771	0.35774	0.245735	0.304505		720	0.551462	0.415941	0.563032		0.327053	0.351634	0.262936	0.288976		720	0.351771	0.35774	0.245735	0.304505	0.788081	0.781817	0.676809
	780	0.327021	0.346318	0.26418	0.293194	0.357736	0.341567	0.249547	0.317997		780	0.558606	0.432751	0.570818		0.327021	0.346318	0.26418	0.293194		780	0.357736	0.341567	0.249547	0.317997	0.81085	0.791884	0.675935
	840	0.337028	0.358418	0.260627	0.302375	0.356859	0.358493	0.248525	0.309927		840	0.5741	0.438252	0.547747		0.337028	0.358418	0.260627	0.302375		840	0.356859	0.358493	0.248525	0.309927	0.831084	0.810935	0.673007
					Figure 2S1f				Figure 2S1g			Figure 2S1h			Figure 2S1e
		Mobile fraction			Mobile fraction (in%)				Exchange half-time (min)			Two phase (in %)			time (min)	GFP-M at Z									mCherry-Z at M
		GFP-M at Z	mCh-Z at M		GFP-M at Z	mCh-Z at M			GFP-M at Z	mCh-Z at M		GFP-M at Z	mCh-Z at M		0	0.426166	0.144892	0.24588	0.098257	0.21247	0.173339	0.175642	0.278313	0.201971	0.487921	0.170878	0.207965	0.127513	0.268808	0.231368	0.205243	0.274684	0.166519
		0.620711	0.67183		62.0711	67.183			172.2	9.786		37.23	61.69		5	0.504644	0.264352	0.337097	0.237797	0.280824	0.23444	0.376296	0.398305	0.314112	0.70473	0.324327	0.459983	0.348925	0.395482	0.565366	0.526723	0.459525	0.393796
		1.17454	1.07337		117.454	107.337			107.8	100.9		24	37.92		10	0.509162	0.290369	0.347228	0.264113	0.307596	0.214586	0.401735	0.414822	0.320004	0.702826	0.340693	0.491123	0.377151	0.42585	0.593524	0.541255	0.477118	0.433209
		0.305403	0.644733		30.5403	64.4733			252.9	101.4		17.5	34.13		15	0.540172	0.313373	0.349528	0.268712	0.306339	0.20873	0.40539	0.424742	0.31214	0.697409	0.372896	0.5133	0.406062	0.447174	0.603466	0.582509	0.488122	0.41925
		0.897932	0.616892		89.7932	61.6892			218	117.9		28.61	45.61		20	0.562882	0.316806	0.348453	0.271805	0.300887	0.219972	0.432825	0.384986	0.33886	0.73774	0.387374	0.522897	0.42648	0.45935	0.616857	0.594649	0.490771	0.454618
		0.733346	0.875871		73.3346	87.5871			409.3	180					25	0.568043	0.325279	0.342226	0.290227	0.3049	0.21966	0.416902	0.396862	0.348643	0.704376	0.404999	0.537452	0.431293	0.455875	0.622873	0.621896	0.505659	0.463866
		0.182065	0.66186		18.2065	66.186			223.7	7.089					60	0.629569	0.410865	0.361211	0.355939	0.346906	0.236222	0.483252	0.4455	0.355993	0.81393	0.447465	0.571975	0.513982	0.489127	0.690914	0.671812	0.578288	0.503642
		0.888073	0.679532		88.8073	67.9532			109.8	59.05					90	0.594314	0.436553	0.403295	0.416239	0.372905	0.237229	0.532707	0.543395	0.374514	0.861194	0.463263	0.650153	0.558869	0.520959	0.716683	0.754698	0.637899	0.510418
		0.459352	0.979874		45.9352	97.9874			60.17	31.92					120	0.633671	0.457892	0.399365	0.464036	0.390045	0.252982	0.583248	0.602778	0.397863	0.81951	0.50339	0.614416	0.56855	0.558982	0.681104	0.797325	0.714163	0.557636
		0.45061	0.511597		45.061	51.1597			257.8	137.8					180	0.731339	0.552231	0.402176	0.513884	0.445476	0.273236	0.731654	0.611646	0.417272	0.882967	0.533664	0.598713	0.629239	0.583927	0.701285	0.921104	0.778275	0.56682
															240	0.786285	0.589433	0.414282	0.595774	0.500897	0.266764	0.773958	0.676751	0.40994	0.925798	0.588759	0.619624	0.690205	0.598418	0.716794	0.984402	0.806656	0.522099
	Mean	0.63467	0.746173		63.467	74.6173			201.297	82.8717		26.835	44.8375		300	0.859217	0.618651	0.399864	0.638734	0.524773	0.278479	0.826004	0.669213	0.475749	0.96011	0.608507	0.584429	0.776317	0.599021	0.726101	1.0041	0.795	0.604646
															360	0.93221	0.636794	0.44768	0.696335	0.582078	0.27996	0.800331	0.691198	0.452833	0.929786	0.592323	0.62564	0.758503	0.635357	0.755391	0.957596	0.777351	0.663415
															420	0.989429	0.639529	0.432519	0.712509	0.632477	0.289998	0.825994	0.696073	0.451935	1.00788	0.638896	0.634964	0.806054	0.665636	0.765718	1.00651	0.762553	0.675789
															480	1.01516	0.659452	0.469651	0.731146	0.643171	0.297941	0.85391	0.691694	0.479102	1.00651	0.638325	0.631803	0.790496	0.691523	0.738977	0.994361	0.738163	0.660841
															540	1.02942	0.655829	0.498609	0.820491	0.682555	0.296011	0.844815	0.660965	0.488797	0.968437	0.639004	0.762896	0.852127	0.683624	0.752826	1.00111	0.70788	0.635403
															600	1.04281	0.681065	0.501392	0.798109	0.725955	0.301148	0.83449	0.678732	0.511709	1.03	0.640469	0.704074	0.810668	0.70605	0.7956	0.968663	0.71093	0.67325
															660	1.07427	0.708315	0.498177	0.82117	0.732196	0.306256	0.853672	0.649703	0.496802	1.03466	0.644349	0.67813	0.838593	0.709573	0.763115	0.990806	0.684683	0.720175
															720	1.06331	0.695034	0.465452	0.838978	0.747703	0.314903	0.88271	0.642888	0.529513	1.03948	0.679535	0.711006	0.828049	0.740672	0.780389	0.998997	0.682033	0.69869
															780	1.03797	0.713003	0.467847	0.878171	0.767798	0.326579	0.92311	0.612803	0.562808	1.01073	0.67675	0.692052	0.8749	0.756366	0.782631	1.01604	0.653463	0.738892
															840	1.09828	0.676672	0.477166	0.906987	0.790063	0.323847	0.907756	0.610992	0.562786	1.03638	0.708874	0.696588	0.891817	0.752542	0.754291	0.984264	0.645695	0.726257
