# Supplementary material for: Visualizing sarcomere and cellular dynamics in skeletal muscle to improve cell therapies
Source: eLife. 2024 Dec 17;13:e95597. doi: 10.7554/eLife.95597 (PMC11651650; doi:10.7554/eLife.95597)
Supplement: Figure 2—source data 1. [file elife-95597-fig2-data1.xlsx]

## Sheet: Figure2a
Figure 2a		Pre		Bleach (0 min)		1 h		2 h		4 h		14 h
	length [um]	GFP-M	mCh-Z	GFP-M	mCh-Z	GFP-M	mCh-Z	GFP-M	mCh-Z	GFP-M	mCh-Z	GFP-M	mCh-Z
	0	241.528	258.139	165.876	219.466	156.138	237.159	188.557	211.747	185.089	211.874	187.684	226.24
	0.1072	257.271	256.215	171.574	196.159	166.765	214.006	208.57	206.282	202.419	186.755	194.553	215.708
	0.2144	285.17	236.773	195.248	178.11	173.091	195.587	245.391	198.8	230.973	170.03	205.236	182.393
	0.3216	338.56	225.707	218.233	172.739	189.255	179.749	316.142	190.811	297.397	165.853	248.751	176.689
	0.4288	433.646	226.993	277.576	170.328	214.587	166.708	423.431	185.851	391.699	168.043	288.479	169.072
	0.536	482.133	229.329	350.571	165.542	280.474	162.591	464.476	181.385	448.197	162.494	333.354	165.972
	0.6432	458.826	227.394	376.237	163.45	350.051	166.969	422.546	178.011	428.155	158.131	359.177	164.677
	0.7504	388.078	223.77	329.466	166.447	396.467	160.495	326.211	171.846	347.933	165.435	373.214	166.346
	0.8576	308.566	226.6	255.508	158.967	378.69	161.022	248.261	176.192	278.521	165.566	371.555	159.034
	0.9648	282.964	230.757	201.231	159.133	294.623	165.976	212.964	175.876	227.955	172.131	343.722	172.957
	1.072	261.689	251.734	173.852	164.516	237.399	163.77	189.898	181.924	205.499	178.93	283.594	181.304
	1.1792	241.291	261.66	153.525	173.44	209.168	172.902	170.736	204.979	190.81	194.3	240.331	186.915
	1.2864	230.938	300.242	141.129	204.202	205.038	195.167	166.726	229.877	167.615	227.124	204.865	205.193
	1.3936	234.068	341.649	132.501	239.714	186.47	214.148	156.408	264.783	161.734	267.497	188.42	217.293
	1.5008	234.052	358.05	133.25	270.209	167.987	242.285	161.007	294.667	158.54	285.588	181.109	243.857
	1.608	252.672	355.747	133.774	265.802	157.103	263.405	162.946	291.224	165.416	272.129	169.373	241.815
	1.7152	247.864	346.376	134.609	248.482	157.804	276.976	166.985	271.588	173.511	266.953	163.646	253.325
	1.8224	250.137	324.22	137.132	237.997	154.005	265.812	158.715	259.633	173.627	262.512	157.985	261.467
	1.9296	244.586	313.465	127.98	217.986	158.679	246.865	153.085	251.256	166.569	250.006	160.07	260.078
	2.0368	241.048	332.945	123.901	210.154	148.349	227.445	154.292	246.463	163.054	243.088	160.215	249.565
	2.144	261.761	345.662	116.652	207.131	146.469	223.883	140.374	254.838	163.793	255.933	167.751	253.86
	2.2512	260.97	351.925	116.394	205.365	144.877	216.839	149.668	253.674	160.187	254.456	168.785	244.359
	2.3584	257.912	378.954	118.162	217.349	140.341	219.648	133.454	263.79	156.03	268.159	162.596	227.465
	2.4656	258.405	375.531	107.849	225.196	139.915	222.262	123.8	263.466	135.22	274.189	159.184	222.374
	2.5728	250.366	369.51	99.337	214.276	130.74	223.824	113.404	245.181	131.89	255.717	152.662	203.406
	2.68	247.884	331.631	92.135	182.274	116.709	216.038	119.524	207.204	127.84	216.038	149.305	177.334
	2.7872	245.683	300.114	82.796	142.362	110.983	187.308	110.037	174.501	123.84	199.164	153.923	168.449
	2.8944	266.602	272.056	75.978	105.738	104.336	159.329	112.693	155.454	125.526	171.414	147.779	154.7
	3.0016	280.537	265.349	77.208	86.6383	97.3203	142.721	116.31	135.268	130.921	150.096	157.32	137.185
	3.1088	296.846	249.205	72.214	74.9763	104.366	126.149	126.845	130.983	138.856	135.651	165.439	127.066
	3.216	339.233	242.018	74.68	67.6553	99.7893	120.684	133.572	117.913	160.551	132.058	186.219	124.509
	3.3232	420.587	247.258	90.484	67.1233	102.023	111.587	155.194	117.137	184.441	126.291	212.124	127.136
	3.4304	479.878	244.212	93.445	54.9063	111.262	109.078	159.3	105.635	197.199	128.385	222.354	116.564
	3.5376	483.558	237.483	88.508	52.3063	118.339	101.526	138.16	107.441	181.362	126.567	210.742	117.771
	3.6448	426.137	239.607	62.945	48.0133	117.391	101.01	116.828	106.903	160.014	120.822	193.089	124.476
	3.752	358.684	245.331	47.41	37.7333	107.17	95.4133	105.294	115.218	134.138	118.586	165.731	126.679
	3.8592	314.798	242.093	44.174	40.4263	92.3243	98.9293	98.1687	107.919	122.011	122.504	158.172	120.503
	3.9664	272.678	244.515	38.514	37.2353	79.6333	99.5863	93.2997	114.811	113.562	124.686	149.986	123.744
	4.0736	263.883	276.323	38.039	35.3653	80.6663	94.6043	92.0727	122.805	104.241	133.501	135.963	146.17
	4.1808	263.189	296.464	34.562	40.2813	78.6853	96.8463	93.0587	126.53	101.17	137.909	133.498	153.031
	4.288	260.002	337.551	32.926	38.4233	79.6513	100.582	93.9547	143.501	104.279	155.198	126.037	162.132
	4.3952	265.823	379.187	31.378	35.8073	77.3853	112.297	102.824	153.533	105.259	169.403	130.814	169.814
	4.5024	255.362	382.001	30.861	32.6523	79.2553	124.666	99.9537	166.971	114.143	186.311	133.974	181.527
	4.6096	259.305	364.283	27.715	36.6063	87.4033	129.678	105.586	156.669	128.548	187.525	130.153	187.091
	4.7168	263.171	347.845	26.45	26.0143	87.1253	130.88	104.678	157.625	121.639	190.937	127.752	182.527
	4.824	267.742	328.418	22.85	27.9723	87.0663	128.232	97.8757	161.945	122.243	186.971	128.261	185.394
	4.9312	263.033	336.543	26.277	26.4353	82.9293	133.52	94.1527	164.874	118.124	192.07	126.634	184.043
	5.0384	258.603	335.738	25.957	30.4893	82.0883	130.632	98.8847	158.665	124.393	182.726	130.012	183.033
	5.1456	266.807	339.793	27.101	27.1983	81.9263	131.015	102.757	163.856	124.736	189.083	124.599	180.31
	5.2528	265.955	354.643	20.963	24.6213	78.2913	120.735	93.3077	162.576	121.155	183.438	128.684	176.957
	5.36	267.4	369.132	19.565	22.1243	81.5123	122.606	88.6557	154.955	123.317	184.884	131.155	165.931
	5.4672	263.216	385.134	26.89	23.5063	82.4003	120.583	90.5477	141.733	115.315	196.4	129.721	161.319
	5.5744	258.058	371.287	21.847	24.0513	80.9553	121.529	85.5457	133.723	100.023	176.277	131.315	143.196
	5.6816	254.11	341.132	20.132	23.1713	70.4433	110.258	79.0477	128.178	101.943	162.553	125.965	139.905
	5.7888	251.592	295.691	21.684	27.1703	65.6593	109.101	81.7547	120.105	101.955	157.697	129.109	143.072
	5.896	269.897	274.682	21.467	28.0063	60.3713	102.863	70.3667	115.875	103.829	143.201	139.787	139.869
	6.0032	295.794	265.101	21.416	23.1233	62.8623	95.3473	73.7907	108.309	103.791	131.465	160.758	136.029
	6.1104	329.329	248.57	22.792	18.9433	68.6563	90.9413	80.9527	102.166	101.861	118.349	175.273	134.898
	6.2176	380.269	243.25	22.724	20.4323	65.0593	85.1333	85.0657	107.435	112.711	125.257	185.133	141.408
	6.3248	438.398	249.923	22.029	22.6383	70.3543	92.0463	87.9677	104.622	124.413	124.068	188.478	135.675
	6.432	499.038	248.76	26.346	29.9743	69.6473	85.0723	89.7367	96.5463	134.765	118.137	187.195	122.188
	6.5392	499.324	250.482	18.566	23.5203	71.1673	88.0443	86.3117	99.2373	131.071	121.398	170.905	138.575
	6.6464	450.477	247.617	21.811	19.9563	71.4703	90.3783	79.4817	94.8313	130.912	116.281	171.112	148.923
	6.7536	360.011	256.012	18.932	21.4753	69.7393	90.6273	85.8607	97.3883	121.671	115.401	163.377	155.925
	6.8608	312.056	270.294	16.756	23.1213	72.7603	82.7873	75.7367	103.498	114.736	126.415	153.224	170.366
	6.968	278.84	275.724	17.748	23.2313	67.7293	81.0333	77.2027	110.035	103.612	129.599	149.426	172.192
	7.0752	271.906	295.277	19.757	26.7423	69.8323	85.3413	81.2957	103.032	99.5623	127.937	144.185	174.507
	7.1824	263.395	319.314	23.01	23.1893	74.7903	93.8873	81.5407	121.469	103.993	133.023	140.259	187.371
	7.2896	261.491	354.57	24.145	24.2653	70.8903	102.218	91.6807	136.06	105.134	147.767	139.491	187.744
	7.3968	266.28	376.417	20.823	26.4163	78.7023	103.804	91.6287	149.577	111.78	161.055	142.318	202.912
	7.504	264.958	377.496	22.567	25.1483	76.0493	114.771	102.27	148.977	116.703	180.489	143.829	200.929
	7.6112	269.122	358.943	19.404	25.1713	75.6523	118.367	105.225	148.78	109.499	181.522	143.793	200.659
	7.7184	277.028	349.148	22.153	30.2623	82.8893	113.91	94.1077	146.049	112.209	180.763	134.045	214.012
	7.8256	274.041	336.698	23.629	30.4193	86.9913	121.49	91.3377	145.214	113.956	182.887	142.905	203.632
	7.9328	275.504	339.558	27.06	29.0353	87.4723	128.311	99.5317	150.862	117.12	176.467	137.501	198.027
	8.04	277.012	340.848	29.112	29.5493	84.7823	129.415	95.3227	159.119	116.815	177.704	138.832	190.165
	8.1472	263.925	347.441	26.103	26.3083	91.0743	129.861	105.072	154.614	121.879	183.773	129.972	180.498
	8.2544	263.873	348.83	29.012	26.7503	92.2583	123.024	98.4037	141.427	125.293	187.423	127.163	167.361
	8.3616	267.331	352.189	29.969	30.0063	83.8053	119.411	88.7497	134.9	127.717	179.992	136.123	167.032
	8.4688	271.675	351.439	32.449	36.1293	79.2363	112.702	88.5617	126.912	126.018	179.582	142.694	152.566
	8.576	258.287	337.409	29.897	32.2883	81.8673	112.098	88.2947	122.558	109.376	162.372	144.528	154.545
	8.6832	266.377	313.226	28.04	29.0793	76.4113	104.997	91.4057	116.068	108.511	142.791	136.299	138.679
	8.7904	289.794	284.306	28.101	40.3393	81.1943	102.592	94.0287	114.437	111.49	139.886	155.917	134.006
	8.8976	309.474	267.843	34.27	44.7293	71.2233	101.721	94.3397	107.173	123.675	131.476	176.224	133.802
	9.0048	352.021	269.993	39.956	45.6033	76.4273	97.9003	103.107	102.5	125.177	138.906	184.763	130.183
	9.112	387.863	265.998	42.385	46.9243	79.0783	103.045	101.147	105.907	132.913	134.883	194.887	136.907
	9.2192	428.216	259.411	37.684	52.6613	78.0363	97.1163	105.954	105.512	145.186	126.823	177.979	128.774
	9.3264	463.176	251.202	36.975	52.0723	80.9373	94.8773	107.835	109.202	148.458	128.205	159.676	124.295
	9.4336	479.779	252.201	42.887	57.3523	90.3503	99.8163	98.6917	109.227	141.346	132.487	152.335	131.873
	9.5408	459.001	262.342	44	65.8933	85.3243	100.96	90.9077	102.206	138.931	138.533	158.314	139.088
	9.648	419.671	268.123	48.17	74.8553	87.1843	103.132	95.9667	119.037	133.088	141.143	164.649	152.107
	9.7552	349.551	268.866	52.883	85.4543	86.4083	110.006	94.6497	118.824	121.609	138.65	160.852	160.988
	9.8624	305.496	286.002	53.523	89.4773	85.2803	102.978	95.7977	117.463	121.962	142.891	138.567	161.379
	9.9696	289.168	296.286	58.036	91.9903	91.4333	115.296	97.2777	124.127	116.827	145.214	131.313	169.035
	10.0768	283.084	322.753	55.005	93.6113	87.6283	126.106	101.451	134.724	118.558	165.445	133.983	170.448
	10.184	276.026	337.32	65.522	96.1353	98.1093	138.601	112.464	148.661	122.952	175.601	130.758	183.91
	10.2912	272.587	367.411	73.975	106.791	97.7133	153.11	111.975	162.776	124.453	178.983	126.853	189.705
	10.3984	288.128	374.746	81.409	114.375	98.9473	159.81	120.484	162.191	134.608	189.745	129.598	189.248
	10.5056	281.272	380.867	84.744	121.814	108.175	158.603	114.251	167.302	137.212	199.675	134.969	189.679
	10.6128	272.531	372.043	91.856	129.069	112.055	163.558	114.819	178.934	141.396	200.382	140.439	179.326
	10.72	282.229	362.469	97.837	137.703	109.713	162.347	124.388	189.912	153.759	199.43	147.573	174.41
	10.8272	293.308	358.212	107.521	143.508	113.225	164.854	132.729	179.574	157.211	201.927	149.365	164.586
	10.9344	291.093	365.354	124.439	136.979	126.196	173.733	132.532	187.9	154.903	205.751	157.637	158.398
	11.0416	284.914	371.916	134.293	141.196	133.554	182.232	138.2	187.02	155.897	211.342	154.139	162.733
	11.1488	288.866	376.325	140.09	133.579	133.927	187.838	142.221	188.63	156.676	213.577	178.295	156.017
	11.256	290.893	381.012	155.752	132.918	134.061	189.295	151.941	189.385	164.426	194.595	203.059	158.512
	11.3632	293.379	373.275	185.446	131.66	134.743	173.402	152.033	182.555	167.092	191.541	213.955	156.712
	11.4704	303.724	357.32	203.831	129.494	139.633	171.566	156.262	168.82	163.746	189.222	227.697	154.664
	11.5776	311.458	345.924	214.302	134.853	152.793	158.459	176.157	163.479	161.235	185.318	273.63	157.652
	11.6848	313.748	325.34	230.073	139.877	158.105	148.938	180.148	165.195	168.759	180.433	291.557	142.695
	11.792	317.009	295.47	244.391	151.911	176.215	148.735	193.195	151.793	188.867	166.006	284.182	153.759
	11.8992	335.123	279.83	229.669	159.886	196.651	154.726	228.045	146.321	213.041	163.625	252.708	152.181
	12.0064	377.617	278.053	189.536	171.351	218.144	148.076	262.283	154.657	244.123	154.572	223.955	159.017
	12.1136	415.74	263.458	180.906	193.578	257.44	159.487	299.701	164.942	255.675	157.957	224.791	166.229
	12.2208	430.734	260.48	172.739	207.517	273.815	162.33	291.348	165.918	255.473	162.456	227.3	183.579
	12.328	436.559	261.69	159.971	218.656	286.451	163.136	258.339	165.218	256.805	164.696	226.671	202.669
	12.4352	431.276	262.251	158.867	231.972	271.656	170.829	226.368	178.318	256.602	164.905	251.308	210.881
	12.5424	420.154	271.091	155.087	251.083	239.781	180.26	208.556	175.6	265.236	174.533	248.343	225.195
	12.6496	378.101	277.317	164.046	262.725	214.558	178.965	191.513	180.482	246.807	188.09	228.572	224.474
	12.7568	334.896	278.493	158.387	258.282	206.72	178.332	192.877	194.279	237.466	192.301	209.744	222.894
	12.864	316.897	293.857	166.968	266.463	195.126	208.36	201.724	222.37	217.978	211.354	197.842	230.278
	12.9712	298.547	304.669	186.217	265.831	187.577	215.263	191.008	250.862	209.937	227.947	198.17	234.324
