# Supplementary material for: Visualizing sarcomere and cellular dynamics in skeletal muscle to improve cell therapies
Source: eLife. 2024 Dec 17;13:e95597. doi: 10.7554/eLife.95597 (PMC11651650; doi:10.7554/eLife.95597)
Supplement: Figure 2—source data 2. [file elife-95597-fig2-data2.xlsx]

## Sheet: Figure2b
	Figure 2b	Integrated
	time (min)	GFP-M									mCherry-Z
	0	0.196217	0.101257	0.130418	0.077951	0.150699	0.10439	0.142061	0.201912	0.093017	0.324773	0.105373	0.196696	0.092288	0.200197	0.170409	0.173397	0.269024	0.121685
	5	0.224061	0.193091	0.221824	0.160411	0.214178	0.113587	0.291096	0.277063	0.162979	0.477118	0.276762	0.426421	0.324386	0.319683	0.541169	0.46692	0.44975	0.306185
	10	0.233845	0.19321	0.236662	0.171383	0.227759	0.113984	0.304268	0.283246	0.163622	0.489136	0.316365	0.447163	0.356513	0.346047	0.557509	0.491039	0.466186	0.343381
	15	0.23866	0.207544	0.240282	0.178824	0.229134	0.120741	0.326558	0.27733	0.163195	0.516626	0.343516	0.462679	0.380302	0.358101	0.567739	0.519787	0.479178	0.352921
	20	0.235606	0.214677	0.237179	0.196171	0.231423	0.122116	0.324453	0.276621	0.171449	0.51966	0.364372	0.472709	0.389497	0.368726	0.592909	0.538373	0.478069	0.36885
	25	0.25201	0.226122	0.241566	0.195504	0.230594	0.128808	0.339003	0.282982	0.17451	0.532028	0.376443	0.475594	0.435685	0.376862	0.604221	0.540649	0.487831	0.397029
	60	0.275498	0.243736	0.263794	0.229194	0.250241	0.123648	0.382453	0.328997	0.18163	0.572748	0.462897	0.510248	0.524767	0.421738	0.62968	0.604044	0.551845	0.411686
	90	0.272673	0.266489	0.308157	0.256657	0.262123	0.135175	0.439773	0.395717	0.204858	0.582333	0.515063	0.602957	0.555553	0.462925	0.659009	0.640936	0.608125	0.44368
	120	0.301347	0.27807	0.349899	0.276825	0.280387	0.125345	0.495173	0.466873	0.213743	0.634152	0.553291	0.564605	0.638865	0.470401	0.690646	0.676871	0.632517	0.474059
	180	0.3478	0.340579	0.358595	0.318476	0.312614	0.137642	0.573649	0.502756	0.233105	0.691286	0.65006	0.563607	0.686891	0.491865	0.691176	0.827797	0.657463	0.483493
	240	0.374973	0.403772	0.347954	0.361104	0.337152	0.147787	0.637252	0.539882	0.234221	0.729588	0.699693	0.620887	0.764928	0.542329	0.703177	0.85865	0.732814	0.471428
	300	0.42388	0.419619	0.336963	0.414347	0.369626	0.156398	0.653679	0.545929	0.258178	0.754565	0.698896	0.571361	0.803965	0.550926	0.696934	0.931141	0.723739	0.489981
	360	0.469875	0.413127	0.341557	0.449919	0.392293	0.162855	0.645566	0.544538	0.267103	0.802064	0.731	0.665397	0.864089	0.624106	0.706405	0.870867	0.712704	0.493345
	420	0.491719	0.435035	0.36207	0.466142	0.445076	0.176263	0.672453	0.558194	0.276592	0.815254	0.720982	0.682097	0.840375	0.654174	0.714186	0.897656	0.710368	0.524053
	480	0.508401	0.46505	0.361774	0.478719	0.45817	0.184638	0.690258	0.562077	0.265941	0.8244	0.746301	0.691062	0.879146	0.630627	0.705445	0.861686	0.678582	0.535783
	540	0.513368	0.462658	0.405287	0.512317	0.47125	0.185233	0.691616	0.514001	0.284874	0.850468	0.741301	0.790317	0.924968	0.701776	0.726649	0.867488	0.63953	0.497096
	600	0.548977	0.460812	0.479204	0.526604	0.491702	0.191104	0.686093	0.552872	0.289899	0.870154	0.759603	0.739874	0.887805	0.698755	0.731087	0.851943	0.630852	0.512086
	660	0.613111	0.499839	0.503601	0.553315	0.487191	0.194795	0.713118	0.590478	0.295847	0.856158	0.804823	0.73643	0.917151	0.691459	0.727428	0.914104	0.631505	0.50865
	720	0.653537	0.518854	0.481996	0.553397	0.499438	0.194988	0.734181	0.638526	0.31639	0.878242	0.799257	0.686744	0.915952	0.698328	0.73117	0.889232	0.616676	0.52452
	780	0.650224	0.555839	0.469754	0.576596	0.508776	0.212881	0.772604	0.624397	0.315452	0.872563	0.844121	0.715867	0.919563	0.72183	0.73426	0.911661	0.591017	0.525128
	840	0.692126	0.572633	0.457541	0.588463	0.519264	0.20703	0.752644	0.568061	0.322537	0.914294	0.822423	0.756535	0.930592	0.761941	0.740273	0.917075	0.584427	0.517519
