# Supplementary material for: Visualizing sarcomere and cellular dynamics in skeletal muscle to improve cell therapies
Source: eLife. 2024 Dec 17;13:e95597. doi: 10.7554/eLife.95597 (PMC11651650; doi:10.7554/eLife.95597)
Supplement: Figure 2—source data 3. [file elife-95597-fig2-data3.xlsx]

## Sheet: Figure2cde
			Figure 2c				Figure 2d			Figure 2e
	Mobile fraction			Mobile fraction (in%)				Exchange half-life (min)			Fast phase (in %)
	GFP-M	mCh-Z		GFP-M	mCh-Z			GFP-M	mCh-Z		GFP-M	mCh-Z
	0.375438	0.706239		37.5438	70.6239			256.9	90.34		18.74	30.45
	0.52421	0.801131		52.421	80.1131			337.1	128.3		10.78	45.91
	0.621101	0.874625		62.1101	87.4625			277.3	163.1		2.303	27.86
	0.553658	0.923603		55.3658	92.3603			355.6	102.2		15.07	30.07
	0.435143	0.703102		43.5143	70.3102			715.6	218		23.5	25.53
	0.122229	0.686886		12.2229	68.6886			116.5	5.937		28.44	39.05
	0.71162	0.900157		71.162	90.0157			93.78	66.75			57.33
	0.530732	0.530316		53.0732	53.0316			214.5	26.14
	0.253069	0.450544		25.3069	45.0544				12.75
Mean	0.458578	0.730734		45.8578	73.0734			295.91	90.3908		16.4722	36.6
