# Supplementary material for: Visualizing sarcomere and cellular dynamics in skeletal muscle to improve cell therapies
Source: eLife. 2024 Dec 17;13:e95597. doi: 10.7554/eLife.95597 (PMC11651650; doi:10.7554/eLife.95597)
Supplement: Figure 2—source data 4. [file elife-95597-fig2-data4.xlsx]

## Sheet: Figure 2f
	Figure 2f	Integrated																		Between
	time (min)	GFP-M									mCherry-Z									GFP-M at Z									mCherry-Z at M
	0	0.196217	0.101257	0.130418	0.077951	0.150699	0.10439	0.142061	0.201912	0.093017	0.324773	0.105373	0.196696	0.092288	0.200197	0.170409	0.173397	0.269024	0.121685	0.426166	0.144892	0.24588	0.098257	0.21247	0.173339	0.175642	0.278313	0.201971	0.487921	0.170878	0.207965	0.127513	0.268808	0.231368	0.205243	0.274684	0.166519
	5	0.224061	0.193091	0.221824	0.160411	0.214178	0.113587	0.291096	0.277063	0.162979	0.477118	0.276762	0.426421	0.324386	0.319683	0.541169	0.46692	0.44975	0.306185	0.504644	0.264352	0.337097	0.237797	0.280824	0.23444	0.376296	0.398305	0.314112	0.70473	0.324327	0.459983	0.348925	0.395482	0.565366	0.526723	0.459525	0.393796
	10	0.233845	0.19321	0.236662	0.171383	0.227759	0.113984	0.304268	0.283246	0.163622	0.489136	0.316365	0.447163	0.356513	0.346047	0.557509	0.491039	0.466186	0.343381	0.509162	0.290369	0.347228	0.264113	0.307596	0.214586	0.401735	0.414822	0.320004	0.702826	0.340693	0.491123	0.377151	0.42585	0.593524	0.541255	0.477118	0.433209
	15	0.23866	0.207544	0.240282	0.178824	0.229134	0.120741	0.326558	0.27733	0.163195	0.516626	0.343516	0.462679	0.380302	0.358101	0.567739	0.519787	0.479178	0.352921	0.540172	0.313373	0.349528	0.268712	0.306339	0.20873	0.40539	0.424742	0.31214	0.697409	0.372896	0.5133	0.406062	0.447174	0.603466	0.582509	0.488122	0.41925
	20	0.235606	0.214677	0.237179	0.196171	0.231423	0.122116	0.324453	0.276621	0.171449	0.51966	0.364372	0.472709	0.389497	0.368726	0.592909	0.538373	0.478069	0.36885	0.562882	0.316806	0.348453	0.271805	0.300887	0.219972	0.432825	0.384986	0.33886	0.73774	0.387374	0.522897	0.42648	0.45935	0.616857	0.594649	0.490771	0.454618
	25	0.25201	0.226122	0.241566	0.195504	0.230594	0.128808	0.339003	0.282982	0.17451	0.532028	0.376443	0.475594	0.435685	0.376862	0.604221	0.540649	0.487831	0.397029	0.568043	0.325279	0.342226	0.290227	0.3049	0.21966	0.416902	0.396862	0.348643	0.704376	0.404999	0.537452	0.431293	0.455875	0.622873	0.621896	0.505659	0.463866
	60	0.275498	0.243736	0.263794	0.229194	0.250241	0.123648	0.382453	0.328997	0.18163	0.572748	0.462897	0.510248	0.524767	0.421738	0.62968	0.604044	0.551845	0.411686	0.629569	0.410865	0.361211	0.355939	0.346906	0.236222	0.483252	0.4455	0.355993	0.81393	0.447465	0.571975	0.513982	0.489127	0.690914	0.671812	0.578288	0.503642
	90	0.272673	0.266489	0.308157	0.256657	0.262123	0.135175	0.439773	0.395717	0.204858	0.582333	0.515063	0.602957	0.555553	0.462925	0.659009	0.640936	0.608125	0.44368	0.594314	0.436553	0.403295	0.416239	0.372905	0.237229	0.532707	0.543395	0.374514	0.861194	0.463263	0.650153	0.558869	0.520959	0.716683	0.754698	0.637899	0.510418
	120	0.301347	0.27807	0.349899	0.276825	0.280387	0.125345	0.495173	0.466873	0.213743	0.634152	0.553291	0.564605	0.638865	0.470401	0.690646	0.676871	0.632517	0.474059	0.633671	0.457892	0.399365	0.464036	0.390045	0.252982	0.583248	0.602778	0.397863	0.81951	0.50339	0.614416	0.56855	0.558982	0.681104	0.797325	0.714163	0.557636
	180	0.3478	0.340579	0.358595	0.318476	0.312614	0.137642	0.573649	0.502756	0.233105	0.691286	0.65006	0.563607	0.686891	0.491865	0.691176	0.827797	0.657463	0.483493	0.731339	0.552231	0.402176	0.513884	0.445476	0.273236	0.731654	0.611646	0.417272	0.882967	0.533664	0.598713	0.629239	0.583927	0.701285	0.921104	0.778275	0.56682
	240	0.374973	0.403772	0.347954	0.361104	0.337152	0.147787	0.637252	0.539882	0.234221	0.729588	0.699693	0.620887	0.764928	0.542329	0.703177	0.85865	0.732814	0.471428	0.786285	0.589433	0.414282	0.595774	0.500897	0.266764	0.773958	0.676751	0.40994	0.925798	0.588759	0.619624	0.690205	0.598418	0.716794	0.984402	0.806656	0.522099
	300	0.42388	0.419619	0.336963	0.414347	0.369626	0.156398	0.653679	0.545929	0.258178	0.754565	0.698896	0.571361	0.803965	0.550926	0.696934	0.931141	0.723739	0.489981	0.859217	0.618651	0.399864	0.638734	0.524773	0.278479	0.826004	0.669213	0.475749	0.96011	0.608507	0.584429	0.776317	0.599021	0.726101	1.0041	0.795	0.604646
	360	0.469875	0.413127	0.341557	0.449919	0.392293	0.162855	0.645566	0.544538	0.267103	0.802064	0.731	0.665397	0.864089	0.624106	0.706405	0.870867	0.712704	0.493345	0.93221	0.636794	0.44768	0.696335	0.582078	0.27996	0.800331	0.691198	0.452833	0.929786	0.592323	0.62564	0.758503	0.635357	0.755391	0.957596	0.777351	0.663415
	420	0.491719	0.435035	0.36207	0.466142	0.445076	0.176263	0.672453	0.558194	0.276592	0.815254	0.720982	0.682097	0.840375	0.654174	0.714186	0.897656	0.710368	0.524053	0.989429	0.639529	0.432519	0.712509	0.632477	0.289998	0.825994	0.696073	0.451935	1.00788	0.638896	0.634964	0.806054	0.665636	0.765718	1.00651	0.762553	0.675789
	480	0.508401	0.46505	0.361774	0.478719	0.45817	0.184638	0.690258	0.562077	0.265941	0.8244	0.746301	0.691062	0.879146	0.630627	0.705445	0.861686	0.678582	0.535783	1.01516	0.659452	0.469651	0.731146	0.643171	0.297941	0.85391	0.691694	0.479102	1.00651	0.638325	0.631803	0.790496	0.691523	0.738977	0.994361	0.738163	0.660841
	540	0.513368	0.462658	0.405287	0.512317	0.47125	0.185233	0.691616	0.514001	0.284874	0.850468	0.741301	0.790317	0.924968	0.701776	0.726649	0.867488	0.63953	0.497096	1.02942	0.655829	0.498609	0.820491	0.682555	0.296011	0.844815	0.660965	0.488797	0.968437	0.639004	0.762896	0.852127	0.683624	0.752826	1.00111	0.70788	0.635403
	600	0.548977	0.460812	0.479204	0.526604	0.491702	0.191104	0.686093	0.552872	0.289899	0.870154	0.759603	0.739874	0.887805	0.698755	0.731087	0.851943	0.630852	0.512086	1.04281	0.681065	0.501392	0.798109	0.725955	0.301148	0.83449	0.678732	0.511709	1.03	0.640469	0.704074	0.810668	0.70605	0.7956	0.968663	0.71093	0.67325
	660	0.613111	0.499839	0.503601	0.553315	0.487191	0.194795	0.713118	0.590478	0.295847	0.856158	0.804823	0.73643	0.917151	0.691459	0.727428	0.914104	0.631505	0.50865	1.07427	0.708315	0.498177	0.82117	0.732196	0.306256	0.853672	0.649703	0.496802	1.03466	0.644349	0.67813	0.838593	0.709573	0.763115	0.990806	0.684683	0.720175
	720	0.653537	0.518854	0.481996	0.553397	0.499438	0.194988	0.734181	0.638526	0.31639	0.878242	0.799257	0.686744	0.915952	0.698328	0.73117	0.889232	0.616676	0.52452	1.06331	0.695034	0.465452	0.838978	0.747703	0.314903	0.88271	0.642888	0.529513	1.03948	0.679535	0.711006	0.828049	0.740672	0.780389	0.998997	0.682033	0.69869
	780	0.650224	0.555839	0.469754	0.576596	0.508776	0.212881	0.772604	0.624397	0.315452	0.872563	0.844121	0.715867	0.919563	0.72183	0.73426	0.911661	0.591017	0.525128	1.03797	0.713003	0.467847	0.878171	0.767798	0.326579	0.92311	0.612803	0.562808	1.01073	0.67675	0.692052	0.8749	0.756366	0.782631	1.01604	0.653463	0.738892
	840	0.692126	0.572633	0.457541	0.588463	0.519264	0.20703	0.752644	0.568061	0.322537	0.914294	0.822423	0.756535	0.930592	0.761941	0.740273	0.917075	0.584427	0.517519	1.09828	0.676672	0.477166	0.906987	0.790063	0.323847	0.907756	0.610992	0.562786	1.03638	0.708874	0.696588	0.891817	0.752542	0.754291	0.984264	0.645695	0.726257
