# Supplementary material for: Visualizing sarcomere and cellular dynamics in skeletal muscle to improve cell therapies
Source: eLife. 2024 Dec 17;13:e95597. doi: 10.7554/eLife.95597 (PMC11651650; doi:10.7554/eLife.95597)
Supplement: Figure 4—source data 1. [file elife-95597-fig4-data1.xlsx]

## Sheet: Figure4bc
Figure 4b: Mature Myotube		area (in um^2) occupied by						Percentage occupied by						Only red:	Detectable red signal (>20%),	No green signal (<20%)
	time (in h)	only red	majority red	mixed	majority green	only green	total	only red	majority red	mixed	majority green	only green		Majority Red:	Strong red signal (>50%),	Weak green signal (20-50%)
	before	14378.3	0	0	0	1010.48	15388.7	93.4336	0	0	0	6.56637		Mixed:	Strong red signal (>50%),	Strong green signal (>50%)
	0.5	13904.7	460.434	0	1172.35	31.679	15511.3	89.6422	2.96837	0	7.55802	0.204231		Majority Green:	Weak red signal (20-50%),	Strong green signal (>50%)
	1	13158.1	401.741	279.58	1750.39	375.486	15966.7	82.4096	2.51612	1.75102	10.9628	2.35169		Only Green	No red signal (<20%),	Green signal (>20%)
	1.5	12817.3	1458.44	655.283	1556.08	61.948	16611.2	77.1605	8.77985	3.94482	9.36765	0.372929
	2	12263.5	1629.75	1271.18	1772.63	0	17072.7	71.8306	9.5459	7.4457	10.3828	0
	2.5	12990.1	1104.43	1286.81	1586.78	0	17125.8	75.8513	6.44895	7.51386	9.26547	0
	3	12784.4	1450.85	2196.93	1887.3	0	18512.3	69.0591	7.8372	11.8674	10.1949	0
	3.5	12636.9	2587.61	1428.39	1573.98	0	18301.6	69.0479	14.1387	7.80471	8.60024	0
	4	12105.2	1698.86	3634	505.783	0	18281.6	66.2149	9.29268	19.8779	2.76662	0
	4.5	11634.8	2089.64	4038.45	347.712	0	18297.4	63.587	11.4204	22.0712	1.90034	0
	5	10992.3	2070.54	4104.74	920.326	0	18214.4	60.3494	11.3676	22.5357	5.05274	0
	5.5	11104	2310.96	4054.62	1260.66	0	18710.7	59.3457	12.351	21.67	6.73764	0
	6	11275.9	1573.22	4377.05	1368.72	0	18543.2	60.8086	8.48408	23.6046	7.38123	0
	6.5	10322	2042.44	4888.59	788.51	0	17865.7	57.7756	11.4322	27.363	4.41354	0
	7	10543.9	1783.59	4035.31	1056.37	303.34	17802	59.2286	10.019	22.6677	5.93401	1.70397
	7.5	10158.4	1708.08	5225.12	753.359	0	18057.4	56.2562	9.45915	28.9362	4.17202	0
	8	10000.9	1518	5033.2	990.953	249.203	17616.7	56.7693	8.61683	28.5706	5.62508	1.41458
Figure 4c: Immature Myotube		area (in um^2) occupied by						Percentage occupied by
	time (in h)	only red	majority red	mixed	majority green	only green	total	only red	majority red	mixed	majority green	only green
	before	2756.2	0	0	0	1491.64	4247.84	64.8848	0	0	0	35.1152
	0.5	1913.45	117.604	93.302	369.519	1405.82	4039.97	47.3629	2.91101	2.30947	9.14657	34.7978
	1	397.401	1067.87	332.958	1620.2	341.962	3966.74	10.0183	26.9207	8.39374	40.8446	8.62073
	1.5	398.161	646.279	704.864	1517.57	76.703	3612.41	11.022	17.8905	19.5123	42.0098	2.12332
	2	246.491	674.486	845.576	1512.47	111.311	3415.5	7.21683	19.7478	24.757	44.2825	3.25899
	2.5	272.311	545.165	946.906	1163.24	127.693	3131.58	8.69564	17.4086	30.2373	37.1453	4.07759
	3	175.646	766.161	984.01	733.614	173.151	2936.51	5.98144	26.0908	33.5094	24.9825	5.89648
	3.5	154.274	834.51	1082.95	890.491	139.736	3281.52	4.7013	25.4306	33.0016	27.1366	4.25828
	4	285.33	209.604	1846.62	419.208	86.792	2981.65	9.56954	7.0298	61.9328	14.0596	2.91087
