# Supplementary material for: Visualizing sarcomere and cellular dynamics in skeletal muscle to improve cell therapies
Source: eLife. 2024 Dec 17;13:e95597. doi: 10.7554/eLife.95597 (PMC11651650; doi:10.7554/eLife.95597)
Supplement: Figure 4—source data 2. [file elife-95597-fig4-data2.xlsx]

## Sheet: Figure4de
	Figure 4d: Relative mixed area
	time [h]	Immature					Mature
	0	0	0	0	0	0	0	0	0	0
	0.5		0.540098	0.272391	0.596968			0.149684	0.519279	0.108119
	1	0.097317	0.754337	0.773577	0.828063	0.126348	0.022925	0.207088	0.629071	0.283169
	1.5			0.927632	0.851905	0.240887		0.259413	0.710054	0.287811
	2	0.551327	0.876498	0.934368			0.023505	0.225088	0.771194	0.380581
	2.5		1	0.935554	0.949089	0.512442		0.319344	0.830494	0.624273
	3	0.712859	1	0.978876	0.951098	0.528054	0.437404	0.351026	0.802541	0.719534
	3.5		1	0.969577	0.968818	0.697626		0.395396	0.923969	0.684136
	4	0.756692	1		0.952963	0.772273	0.498889	0.463716	0.952085
	4.5		1	0.882303		0.891741		0.448755	0.972355	0.833801
	5		1			0.854156	0.524121	0.505585	0.950403	0.763021
	5.5		1			0.914145		0.565818
	6		1			0.905412	0.743272	0.554599		0.875166
	6.5		1			0.946507		0.624098		0.913458
	7		1			0.9532	0.719249	0.678156		0.862362
	7.5							0.756482		0.859913
	8						0.880223	0.772438		0.918348
	8.5									0.872308
	9						0.910069			0.936366
	Figure 4e: Absolute mixed area (in um^2)
	time [h]	Immature					Mature
	0	0	0	0	0	0	0	0	0	0
	0.5		1638.86	1120.82	1948.27			1016.45	1988.52	700.415
	1	832.99	1697.98	3043.49	2724.85	316.467	98.51	1613.36	2418.58	1988.09
	1.5			3350.08	3032.42	643.132		1610.11	2478.03	2027.58
	2	4014.04	1746.27	3010.29			100.788	1395.4	2462.41	2821.19
	2.5		2263.98	2797.1	3272.4	1228.76		1919.31	2374.42	4346.56
	3	4453.54		2951.05	3344.44	1389.66	1973.33	2213.42	1946.32	4598.59
	3.5			3191.36	3407.8	1900.32		2312.69	2532.71	4336.37
	4	4385.62			3305.82	1993.73	2095.71	2715.52	2841.26
	4.5			2370.74		2498.65		2822.16	2644.46	4835.42
	5						2343.29	3432.42	2419.88	4354.92
	5.5							3799.66
	6						3188.1	3908.26		4640.36
	6.5							4503.44		5316.8
	7						2713.24	4706.65		4711.96
	7.5							5257.89		4585.14
	8						2916.44	5152.32		4429.34
	8.5									4314.89
	9						3540.7			4624.84
