# Supplementary material for: Visualizing sarcomere and cellular dynamics in skeletal muscle to improve cell therapies
Source: eLife. 2024 Dec 17;13:e95597. doi: 10.7554/eLife.95597 (PMC11651650; doi:10.7554/eLife.95597)
Supplement: Figure 5—figure supplement 1—source data 1. [file elife-95597-fig5-figsupp1-data1.xlsx]

## Sheet: Figure5S1bc
																	Figure 5 S1b
Sample		overlap	only GFP	only mCh	overlap	only GFP	only mCh			overlap	only RNA	only Protein	overlap	only RNA	only Protein			RNA overlap	1	0.779846	0.195339	0.252861	0.725704	0.762103	0.381584	0.445587	0.810134	0.193784	0.446107
cell1(20-09)	RNA region	8071.3	0	0	1	0	0		GFP									Protein overlap	0.883315	0.712525	0.398877	0.85652	0.946342	0.798959	0.513899	0.649931	0.914291	0.319916	0.433522
completedFusion	Protein region	7129.5	0	941.799	0.883315	0	0.116685		mCh
pointlist2-cell3(20-09)	RNA region	9529.44	1386.64	1303.55	0.779846	0.113477	0.106677		GFP									ratio	1.1321	1.09448	0.489721	0.295219	0.766852	0.953871	0.742528	0.685592	0.886079	0.605733	1.02903
completedFusion	Protein region	8856.91	1881.77	1691.64	0.712525	0.151385	0.13609		mCh									mean	0.7892	0.641304	0.966677
pointlist2-cell6(20-09)	RNA region	884.527	2277.74	1365.9	0.195339	0.503017	0.301644		GFP	2702.17	460.103	1681.27	0.557891	0.0949931	0.347116			stdev	0.261835	0.247611	0.150241
ongoingFusion	Protein region	1828.11	2555.33	199.701	0.398877	0.55755	0.043573		mCh	1819.75	430.669	208.058	0.740194	0.175177	0.0846287			sem	0.0789461	0.101087	0.0671897
pointlist2-cell13(20-09)	RNA region	263.405	415.506	362.787	0.252861	0.398874	0.348265		GFP	677.314	1.597	616.287	0.522942	0.00123302	0.475825				all	only ongoing	only complete
ongoingFusion	Protein region	1162.44	131.163	63.563	0.85652	0.0966449	0.0468352		mCh	619.338	6.854	606.663	0.502361	0.00555945	0.49208
pointlist2-cell14(20-09)	RNA region	4455.83	1560.39	123.792	0.725704	0.254134	0.0201616		GFP	5176.19	840.024	48.729	0.853461	0.138505	0.00803454
completedFusion	Protein region	5161.4	63.516	229.136	0.946342	0.0116457	0.0420121		mCh	4293.3	286.314	1097.23	0.756283	0.0504354	0.193282
pointlist3-cell4(20-09)	RNA region	1285.06	401.141	0	0.762103	0.237897	0		GFP	1164.88	521.319	0	0.690832	0.309168	0
completedFusion	Protein region	1174.03	0	295.421	0.798959	0	0.201041		mCh	1183.56	82.388	285.892	0.762682	0.0530904	0.184227
pointlist3-cell5(20-09)	RNA region	2603.59	1914.96	2304.55	0.381584	0.280658	0.337757		GFP	2488.53	2030.02	1733.05	0.398063	0.32472	0.277217
ongoingFusion	Protein region	3369.06	852.511	2334.31	0.513899	0.130038	0.356064		mCh	4312.93	595.209	1390.45	0.684746	0.0944989	0.220756
pointlist4-cell3(20-09)	RNA region	2674.85	2034.2	1293.93	0.445587	0.338865	0.215548		GFP	3654.77	1054.28	1026.72	0.637189	0.183808	0.179003
ongoingFusion	Protein region	3249.26	1432.23	317.908	0.649931	0.28648	0.0635893		mCh	3074.77	894.01	492.401	0.689228	0.200398	0.110375
pointlist4-cell4(20-09)	RNA region	6644.33	1360.12	197.073	0.810134	0.165838	0.0240288		GFP	3574.96	4429.49	0	0.446622	0.553378	0
completedFusion	Protein region	3574.02	0.939	334.104	0.914291	0.000240211	0.0854691		mCh	3852.97	2988.44	55.16	0.558679	0.433323	0.00799819
pointlist1-cell4	RNA region	39.834	103.697	62.028	0.193784	0.504463	0.301753		GFP	118.83	20.33	80.615	0.540689	0.0925037	0.366807
	Protein region	70.466	134.146	15.652	0.319916	0.609024	0.0710602		mCh	28.706	77.987	57.076	0.175283	0.476201	0.348515
	RNA region	171.565	84.314	128.704	0.446107	0.219235	0.334659		GFP	241.786	9.202	180.125	0.560841	0.0213448	0.417814
	Protein region	259.365	178.84	160.069	0.433522	0.298927	0.267551		mCh	300.269	0	99.111	0.751838	0	0.248162
	RNA region								GFP
	Protein region								mCh
	RNA region								GFP								Figure 5 S1c
	Protein region								mCh										overlap	only RNA	only Protein		overlap	only RNA	only Protein		overlap	only GFP	only mCh		overlap	only GFP	only mCh
	RNA region								GFP									GFP	0.557891	0.0949931	0.347116	mCh	0.740194	0.175177	0.0846287	RNA	1	0	0	Protein	0.883315	0	0.116685
	Protein region								mCh										0.522942	0.00123302	0.475825		0.502361	0.00555945	0.49208		0.779846	0.113477	0.106677		0.712525	0.151385	0.13609
	RNA region								GFP										0.398063	0.32472	0.277217		0.684746	0.0944989	0.220756		0.195339	0.503017	0.301644		0.398877	0.55755	0.043573
	Protein region								mCh										0.637189	0.183808	0.179003		0.689228	0.200398	0.110375		0.252861	0.398874	0.348265		0.85652	0.0966449	0.0468352
	RNA region								GFP										0.853461	0.138505	0.00803454		0.756283	0.0504354	0.193282		0.725704	0.254134	0.0201616		0.946342	0.0116457	0.0420121
	Protein region								mCh										0.690832	0.309168	0		0.762682	0.0530904	0.184227		0.762103	0.237897	0		0.798959	0	0.201041
																			0.446622	0.553378	0		0.558679	0.433323	0.00799819		0.381584	0.280658	0.337757		0.513899	0.130038	0.356064
																											0.445587	0.338865	0.215548		0.649931	0.28648	0.0635893
																	all	mean	0.586714	0.229401	0.183885		0.670596	0.14464	0.184764		0.810134	0.165838	0.0240288		0.914291	0.000240211	0.0854691
																		stdev	0.155271	0.182974	0.191119		0.101687	0.145197	0.154174		0.193784	0.504463	0.301753		0.319916	0.609024	0.0710602
																		sem	0.058687	0.0691577	0.0722361		0.0384342	0.0548792	0.0582724		0.446107	0.219235	0.334659		0.433522	0.298927	0.267551
																		t-test RNA vs protein	0.657134				0.62526
																	only ongoing	mean	0.529021	0.151189	0.31979		0.654132	0.118908	0.22696
																		stdev	0.0995336	0.137625	0.124802		0.10426	0.088035	0.186349
																		sem	0.0497668	0.0688125	0.0624011		0.0521298	0.0440175	0.0931743
																		t-test RNA vs protein	0.119442				0.334774
